# Supplementary material for: Highly selective formate formation via bicarbonate conversions
Source: Royal Society of Chemistry journal article supplement (doi:10.1039/d4ey00122b), 2024-01-01
Supplement: d4ey00122b1.pdf [file d4ey00122b1.pdf]

Supporting Information

# Highly Selective Formate Formation via Bicarbonate Conversions

*Kohta Nomoto, Takuya Okazaki, Kosuke Beppu, Tetsuya Shishido, Fumiaki Amano\**

Department of Applied Chemistry for Environment, Tokyo Metropolitan University, 1-1  
Minami-Osawa, Hachioji, Tokyo 192-0397, Japan

## **Corresponding Author**

\* Fumiaki Amano

Postal: Department of Applied Chemistry for Environment, Tokyo Metropolitan University,  
1-1 Minami-Osawa, Hachioji, Tokyo 192-0397, Japan

Phone: +81-42-677-2852

E-mail: [f.amano@tmu.ac.jp](mailto:f.amano@tmu.ac.jp)

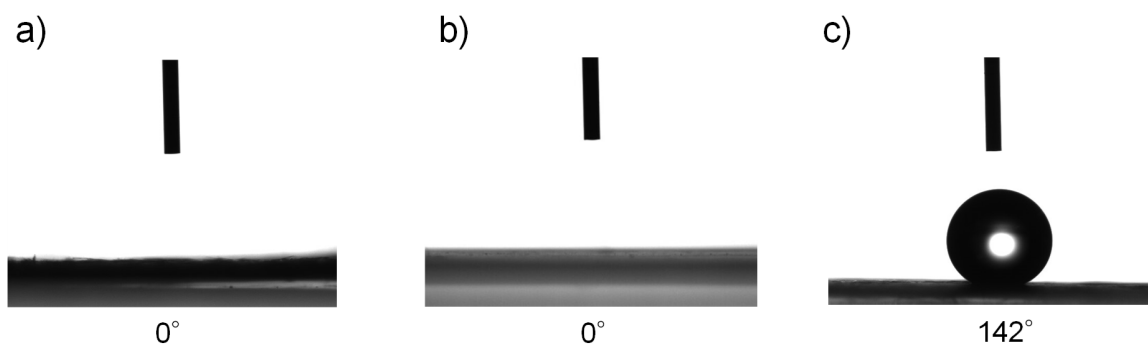

**Figure S1.** Contact angle measurement: (a) bismuth cathode, (b) hydrophilic porous membrane (mixed cellulose esters filter), and (c) PTFE-deposited bismuth cathode.

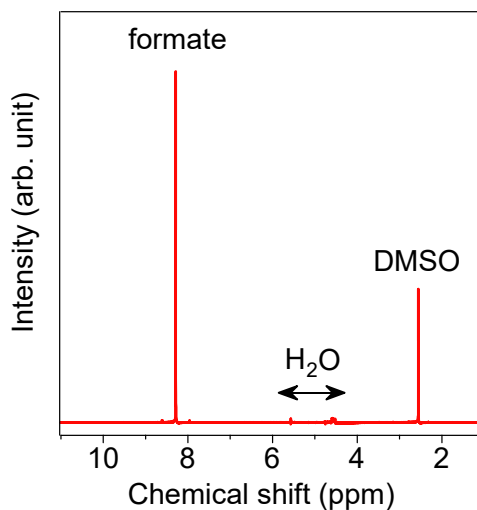

**Figure S2.** Proton nuclear magnetic resonance ( $^1\text{H}$  NMR) spectra of the catholyte solution after 1-h bicarbonate electrolysis at  $100 \text{ mA cm}^{-2}$ . The singlet peaks at 8.35 ppm and 2.50 ppm are attributed to formate and dimethyl sulfoxide (DMSO, internal standard). Water signals were suppressed. No peaks attributable to other  $\text{CO}_2$  reduction products were observed.

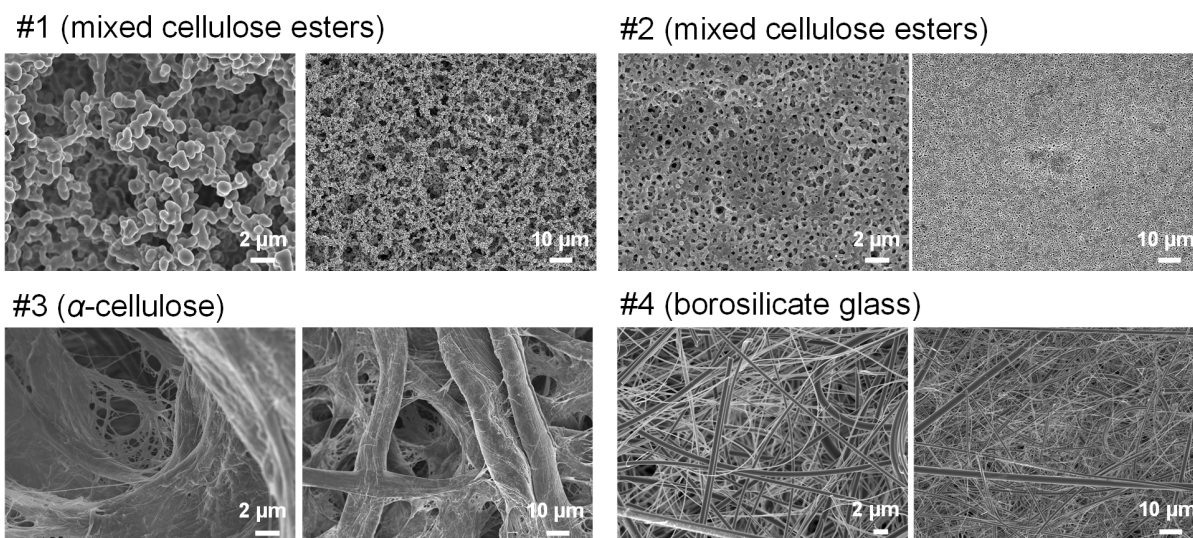

**Figure S3.** SEM images of porous membranes (#1–4) as an intermediate layer.

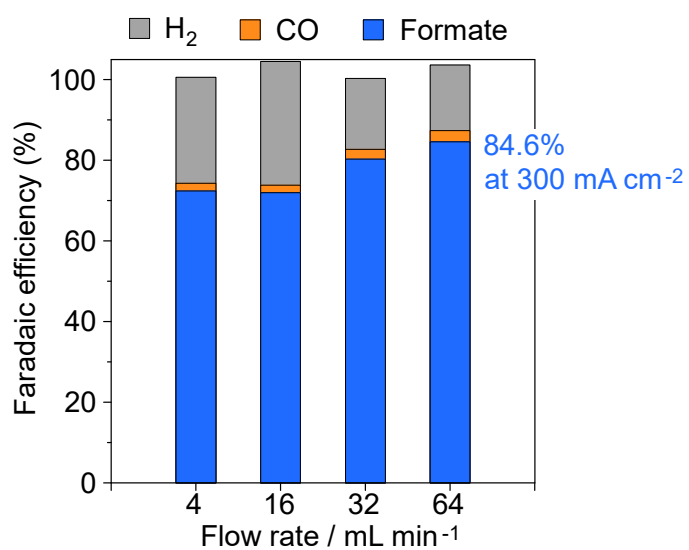

**Figure S4.** Effect of flow rate of 3.0 M KHCO<sub>3</sub> (pH 8.5) on FEs of each product at 300 mA cm<sup>-2</sup>. The flow rate of 64 mL min<sup>-1</sup> enhanced formate FE to 84.6% even at 300 mA cm<sup>-2</sup>.

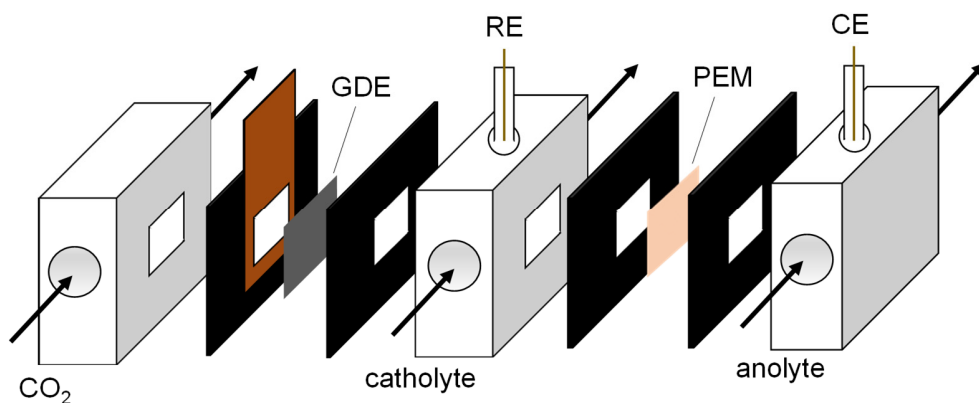

**Figure S5.** Schematics of gas-fed CO<sub>2</sub> electrolyzer. Gaseous CO<sub>2</sub> was supplied to the PTFE-treated Bi cathode (hydrophobic GDE) at 50 mL min<sup>-1</sup>. Solutions of 3.0 M KHCO<sub>3</sub> were supplied at 4 mL min<sup>-1</sup> as catholyte and anolyte. The reference electrode (RE) and counter electrode (CE) were Ag/AgCl and Pt wire electrodes, respectively.

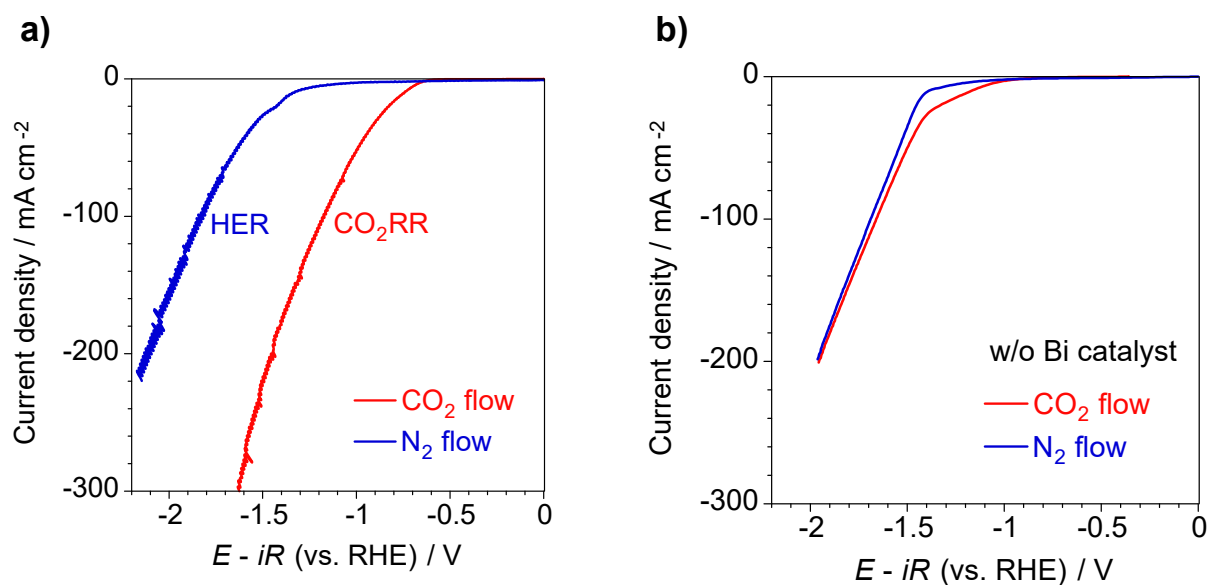

**Figure S6.** Linear sweep voltammetry (LSV) curves of (a) PTFE-treated Bi cathode and (b) PTFE-treated carbon paper (without Bi catalyst) in the gas-fed electrolyzer under N<sub>2</sub> and CO<sub>2</sub> flows. The cathodic current under N<sub>2</sub> flow is attributed to HER.

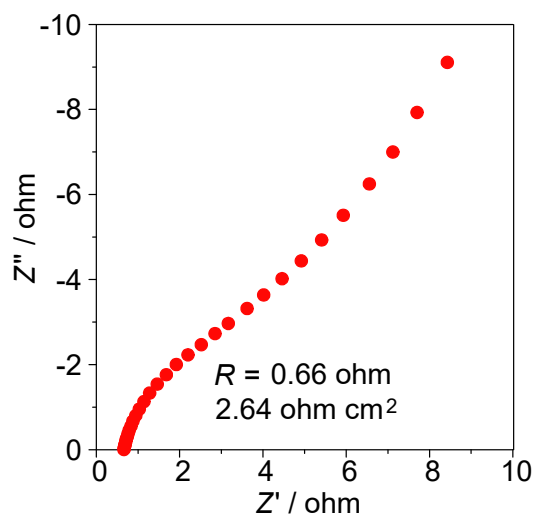

**Figure S7.** Nyquist plot of a bicarbonate electrolyzer at open circuit potential (frequencies from 500 kHz to 1 Hz). The x-intercept was used as the ohmic resistance ( $R$ ).

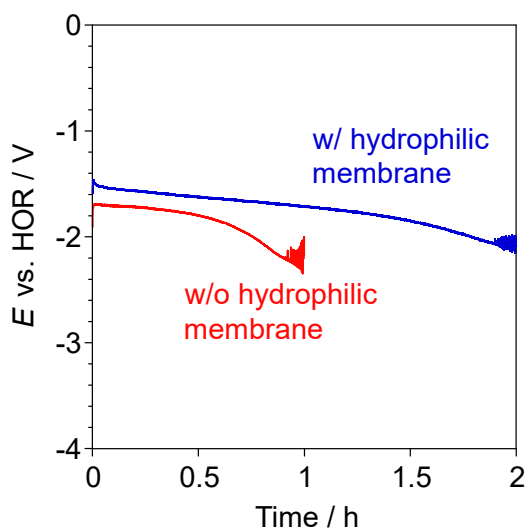

**Figure S8.** Chronopotentiometry at  $100 \text{ mA cm}^{-2}$  with and without intermediate hydrophilic membrane when Pt/CB anode is used for HOR. Reactions were performed under  $3.0 \text{ M KHCO}_3$  flow at  $32 \text{ mL min}^{-1}$  using a grid flow plate. The overpotential gradually increased and became unstable in 1–2 hours when using a Pt/CB cathode.

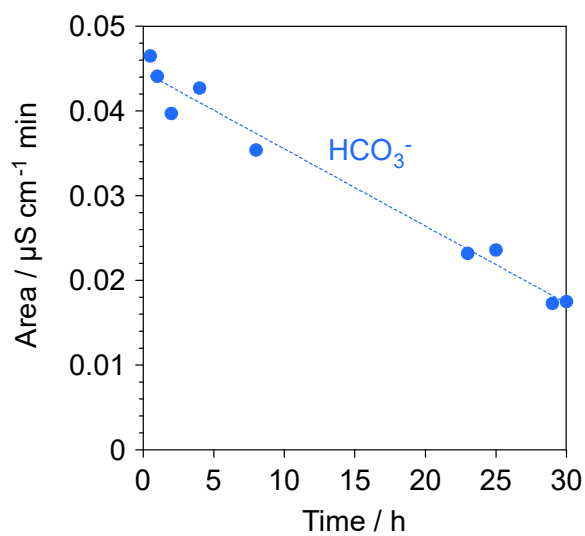

**Figure S9.** Time course of ion chromatography peak area of bicarbonate ion. The peak area gradually decreased from 3.0 M  $\text{KHCO}_3$  over time during the 30-h reaction at  $100 \text{ mA cm}^{-2}$ .  $\text{CO}_2$  gas was continuously bubbled into the circulating electrolyte during the reaction.

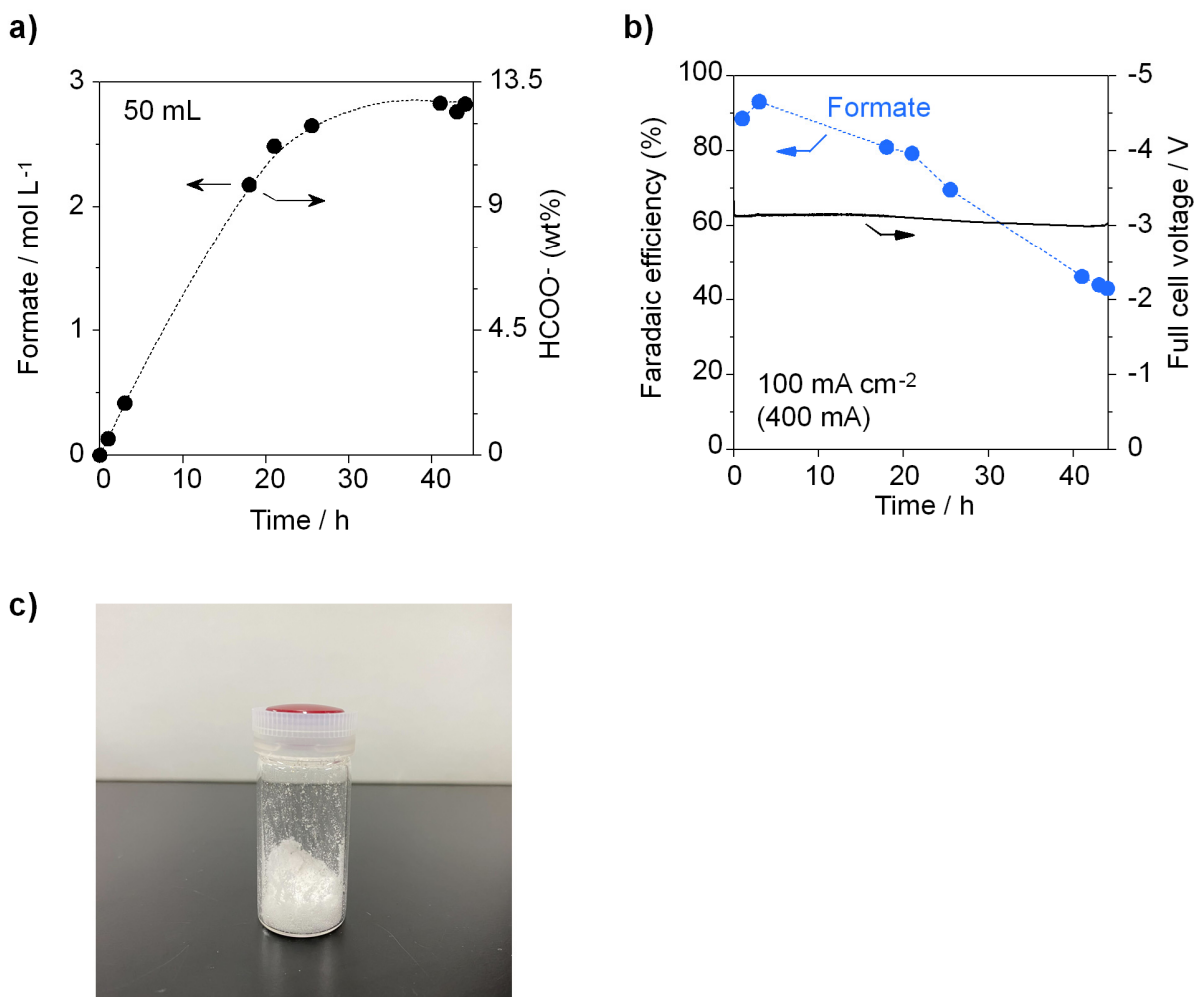

**Figure S10.** Electrochemical formate formation by a bicarbonate electrolyzer using IrO<sub>2</sub> anode for OER (OER|PEM|HCO<sub>3</sub><sup>-</sup>): (a) Concentration of formate in the circulated 50 mL catholyte (3.0 M KHCO<sub>3</sub>) at 100 mA cm<sup>-2</sup>. (b) Corresponding time course of formate FE and full cell voltage (without *iR* compensation). Reactions were performed under 3.0 M KHCO<sub>3</sub> flow at 32 mL min<sup>-1</sup> using a mixed cellulose esters membrane and a grid flow plate. The bicarbonate feedstock was continuously bubbled with 100% CO<sub>2</sub> gas to make up the loss. (c) Solid HCOOK electrochemically synthesized from KHCO<sub>3</sub> aqueous solution. The precipitate was obtained by evaporating the catholyte after the bicarbonate-fed electrolysis.
